# Correction: Mammalian DNA methyltransferases: new discoveries and open questions

Humaira Gowher and Albert Jeltsch

*Biochemical Society Transactions* (2018) 46; 1191–1202; DOI: 10.1042/BST20170574

The authors have found an error in [Figure 1](#) of their review which they would like to correct. In the original version the outer set of arrows pointed in the incorrect direction. The correct version is:

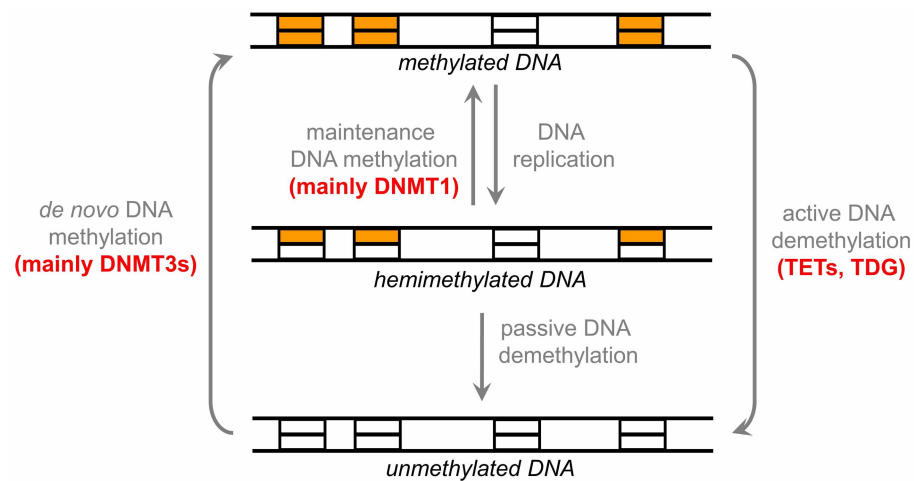

**Figure 1. Cycle of DNA methylation in human cells and during development (adapted from [11]).**

DNA methylation patterns are generated during development and germ cell differentiation by *de novo* methyltransferases and kept through DNA replication by maintenance methylation. DNA methylation can be lost through passive or active demethylation. Typically, Dnmt1 is considered to be a maintenance enzyme, whereas Dnmt3a and Dnmt3b are regarded as *de novo* methyltransferases (TET, ten eleven translocation enzyme; TDG, thymine DNA glycosylase)

Correction published:  
24 June 2019
